# Supplementary material
Source: PubMed Central journal article supplement (PMC10167545)
Supplement: EIJ-D-22-00442_Scotti_SD.pdf [file EIJ-D-22-00442_Scotti_SD.pdf]

## Supplementary data

### Supplementary Appendix 1. PRISMA checklist.

| Section/topic             | #  | Checklist item                                                                                                                                                                                                                                                                                              | Reported on page #              |
|---------------------------|----|-------------------------------------------------------------------------------------------------------------------------------------------------------------------------------------------------------------------------------------------------------------------------------------------------------------|---------------------------------|
| <b>TITLE</b>              |    |                                                                                                                                                                                                                                                                                                             |                                 |
| Title                     | 1  | Identify the report as a systematic review, meta-analysis, or both.                                                                                                                                                                                                                                         | 1                               |
| <b>ABSTRACT</b>           |    |                                                                                                                                                                                                                                                                                                             |                                 |
| Structured summary        | 2  | Provide a structured summary including, as applicable: background; objectives; data sources; study eligibility criteria, participants, and interventions; study appraisal and synthesis methods; results; limitations; conclusions and implications of key findings; systematic review registration number. | 2                               |
| <b>INTRODUCTION</b>       |    |                                                                                                                                                                                                                                                                                                             |                                 |
| Rationale                 | 3  | Describe the rationale for the review in the context of what is already known.                                                                                                                                                                                                                              | 4                               |
| Objectives                | 4  | Provide an explicit statement of questions being addressed with reference to participants, interventions, comparisons, outcomes, and study design (PICOS).                                                                                                                                                  | 4                               |
| <b>METHODS</b>            |    |                                                                                                                                                                                                                                                                                                             |                                 |
| Protocol and registration | 5  | Indicate if a review protocol exists, if and where it can be accessed (e.g., Web address), and, if available, provide registration information including registration number.                                                                                                                               | 5                               |
| Eligibility criteria      | 6  | Specify study characteristics (e.g., PICOS, length of follow-up) and report characteristics (e.g., years considered, language, publication status) used as criteria for eligibility, giving rationale.                                                                                                      | 5                               |
| Information sources       | 7  | Describe all information sources (e.g., databases with dates of coverage, contact with study authors to identify additional studies) in the search and date last searched.                                                                                                                                  | 5, supplementary data           |
| Search                    | 8  | Present full electronic search strategy for at least one database, including any limits used, such that it could be repeated.                                                                                                                                                                               | supplementary data              |
| Study selection           | 9  | State the process for selecting studies (i.e., screening, eligibility, included in systematic review, and, if applicable, included in the meta-analysis).                                                                                                                                                   | 5, figure 1, supplementary data |
| Data collection process   | 10 | Describe method of data extraction from reports (e.g., piloted forms, independently, in duplicate) and any processes for obtaining and confirming data from investigators.                                                                                                                                  | 5                               |
| Data items                | 11 | List and define all variables for which data were sought (e.g., PICOS, funding sources) and any assumptions and simplifications made.                                                                                                                                                                       | 5, 6, 7                         |

|                                    |    |                                                                                                                                                                                                                        |      |
|------------------------------------|----|------------------------------------------------------------------------------------------------------------------------------------------------------------------------------------------------------------------------|------|
| Risk of bias in individual studies | 12 | Describe methods used for assessing risk of bias of individual studies (including specification of whether this was done at the study or outcome level), and how this information is to be used in any data synthesis. | 6, 7 |
| Summary measures                   | 13 | State the principal summary measures (e.g., risk ratio, difference in means).                                                                                                                                          | 6, 7 |
| Synthesis of results               | 14 | Describe the methods of handling data and combining results of studies, if done, including measures of consistency (e.g., $I^2$ ) for each meta-analysis.                                                              | 6, 7 |

| Section/topic                 | #  | Checklist item                                                                                                                                                                                           | Reported on page #       |
|-------------------------------|----|----------------------------------------------------------------------------------------------------------------------------------------------------------------------------------------------------------|--------------------------|
| Risk of bias across studies   | 15 | Specify any assessment of risk of bias that may affect the cumulative evidence (e.g., publication bias, selective reporting within studies).                                                             | 6, 7                     |
| Additional analyses           | 16 | Describe methods of additional analyses (e.g., sensitivity or subgroup analyses, meta-regression), if done, indicating which were pre-specified.                                                         | 6, 7                     |
| <b>RESULTS</b>                |    |                                                                                                                                                                                                          |                          |
| Study selection               | 17 | Give numbers of studies screened, assessed for eligibility, and included in the review, with reasons for exclusions at each stage, ideally with a flow diagram.                                          | 8, figure 1              |
| Study characteristics         | 18 | For each study, present characteristics for which data were extracted (e.g., study size, PICOS, follow-up period) and provide the citations.                                                             | 8, supplementary data    |
| Risk of bias within studies   | 19 | Present data on risk of bias of each study and, if available, any outcome level assessment (see item 12).                                                                                                | 8                        |
| Results of individual studies | 20 | For all outcomes considered (benefits or harms), present, for each study: (a) simple summary data for each intervention group (b) effect estimates and confidence intervals, ideally with a forest plot. | 8, 9                     |
| Synthesis of results          | 21 | Present results of each meta-analysis done, including confidence intervals and measures of consistency.                                                                                                  | 8, 9                     |
| Risk of bias across studies   | 22 | Present results of any assessment of risk of bias across studies (see Item 15).                                                                                                                          | 8, 9, supplementary data |
| Additional analysis           | 23 | Give results of additional analyses, if done (e.g., sensitivity or subgroup analyses, meta-                                                                                                              | 9, 10,                   |

|                     |    |                                                                                                                                                                                      |                    |
|---------------------|----|--------------------------------------------------------------------------------------------------------------------------------------------------------------------------------------|--------------------|
|                     |    | regression [see Item 16]).                                                                                                                                                           | supplementary data |
| <b>DISCUSSION</b>   |    |                                                                                                                                                                                      |                    |
| Summary of evidence | 24 | Summarize the main findings including the strength of evidence for each main outcome; consider their relevance to key groups (e.g., healthcare providers, users, and policy makers). | 11, 12, 13, 14     |
| Limitations         | 25 | Discuss limitations at study and outcome level (e.g., risk of bias), and at review-level (e.g., incomplete retrieval of identified research, reporting bias).                        | 16                 |
| Conclusions         | 26 | Provide a general interpretation of the results in the context of other evidence, and implications for future research.                                                              | 14, 15, 16         |
| <b>FUNDING</b>      |    |                                                                                                                                                                                      |                    |
| Funding             | 27 | Describe sources of funding for the systematic review and other support (e.g., supply of data); role of funders for the systematic review.                                           | 1                  |

*From:* Moher D, Liberati A, Tetzlaff J, Altman DG, The PRISMA Group (2009). Preferred Reporting Items for Systematic Reviews and Meta-Analyses: The PRISMA Statement. PLoS Med 6(7): e1000097. doi:10.1371/journal.pmed1000097

## **Supplementary Appendix 2. MOOSE reporting checklist.**

### **Reporting of background should include**

Problem definition *page 4*  
Hypothesis statement *pages 4, 11-14*  
Description of study outcome(s) *page 6*  
Type of exposure or intervention used *page 5*  
Type of study designs used *page 5*  
Study population *page 5*

### **Reporting of search strategy should include**

Qualifications of searchers (eg, librarians and investigators) *page 5*  
Search strategy, including time period included in the synthesis and keywords *page 5, supplementary method 3*  
Effort to include all available studies, including contact with authors *page 5*  
Databases and registries searched *page 5, supplementary method 3*  
Search software used, name and version, including special features used (eg, explosion) *page 5, suppl method 3*  
Use of hand searching (eg, reference lists of obtained articles) *page 5, supplementary method 3*  
List of citations located and those excluded, including justification *figure 1*  
Method of addressing articles published in languages other than English *page 5*  
Method of handling abstracts and unpublished studies *page 5*  
Description of any contact with authors *page 5*

### **Reporting of methods should include**

Description of relevance or appropriateness of studies assembled for assessing the hypothesis to be tested *pages 13-15*  
Rationale for the selection and coding of data (eg, sound clinical principles or convenience) *pages 5-7*  
Documentation of how data were classified and coded (eg, multiple raters, blinding, and interrater reliability) *pages 5-7*  
Assessment of confounding (eg, comparability of cases and controls in studies where appropriate) *pages 5-7*  
Assessment of study quality, including blinding of quality assessors; stratification or regression on possible predictors of study results *page 5-7*  
Assessment of heterogeneity *pages 5-7*  
Description of statistical methods (eg, complete description of fixed or random effects models, justification of whether the chosen models account for predictors of study results, dose-response models, or cumulative meta-analysis) in sufficient detail to be replicated *pages 5-7*  
Provision of appropriate tables and graphics *Table 1,2, Figures 1-3*

### **Reporting of results should include**

Graphic summarising individual study estimates and overall estimate *Figures 1-3, Central Illustration*  
Table giving descriptive information for each study included *Table 1, Supplementary Tables 1,3*  
Results of sensitivity testing (eg, subgroup analysis) *pages 9-10*  
Indication of statistical uncertainty of findings *page 8-10*

### **Reporting of discussion should include**

Quantitative assessment of bias (eg, publication bias) *Supplementary Table 2*  
Justification for exclusion (eg, exclusion of non-English-language citations) *Figure 1*  
Assessment of quality of included studies *Table 1 and Supplementary Table 3*

### **Reporting of conclusions should include**

Consideration of alternative explanations for observed results *pages 11-15*  
Generalisation of the conclusions (ie, appropriate for the data presented and within the domain of the literature review) *pages 11-15*  
Guidelines for future research *page 15*  
Disclosure of funding source *page 1*

### Supplementary Appendix 3. Database search results.

| Database                                                                                                                                                                                                                                                                                                                                                                                                                                                                                       | Search strategy                                                                                                                                                         | Search results |
|------------------------------------------------------------------------------------------------------------------------------------------------------------------------------------------------------------------------------------------------------------------------------------------------------------------------------------------------------------------------------------------------------------------------------------------------------------------------------------------------|-------------------------------------------------------------------------------------------------------------------------------------------------------------------------|----------------|
| PubMed/MEDLINE                                                                                                                                                                                                                                                                                                                                                                                                                                                                                 | (tricuspid[ti]) AND ((replacement[tiab]) OR (bioprosthetic[tiab]) OR (mechanical[tiab]) OR (intervention[tiab]) OR (surgery[tiab]))                                     | 3054           |
| Web of Science                                                                                                                                                                                                                                                                                                                                                                                                                                                                                 | (TI=(tricuspid)) AND (AB=(intervention) OR AB=(replacement)OR AB=(surgery)OR AB=(bioprosthetic) OR AB=(mechanical))                                                     | 1801           |
| SCOPUS                                                                                                                                                                                                                                                                                                                                                                                                                                                                                         | TITLE ( tricuspid ) AND ( TITLE-ABS ( replacement ) OR TITLE-ABS ( intervention ) OR TITLE-ABS ( surgery ) OR TITLE-ABS ( bioprosthetic ) OR TITLE-ABS ( mechanical ) ) | 3222           |
| EMBASE                                                                                                                                                                                                                                                                                                                                                                                                                                                                                         | tricuspid:ti AND (replacement:ab,ti OR surgery:ti OR intervention:ab,ti OR bioprosthetic:ab,ti OR mechanical:ab,ti)                                                     | 3149           |
| <a href="http://www.escardio.org">www.escardio.org</a><br><a href="http://www.acc.org">www.acc.org</a><br><a href="http://www.heart.org">www.heart.org</a><br><a href="http://www.pconline.com">www.pconline.com</a><br><a href="http://www.tctmd.com">www.tctmd.com</a><br><a href="http://www.crtonline.gov">www.crtonline.gov</a><br><a href="http://www.clinicaltrials.gov">www.clinicaltrials.gov</a><br><a href="http://www.clinicaltrialsregister.eu">www.clinicaltrialsregister.eu</a> | Keywords: “tricuspid”, “replacement”, “surgery”, “bioprosthetic”, “mechanical”.                                                                                         |                |

MEDLINE: Medical Literature Analysis and Retrieval System Online; EMBASE: Excerpta Medica Database

## Supplementary Appendix 4. Definitions.

| Study                           | Acute kidney injury                                                                                 | Liver disease     | Bleeding                                                                                                          | Structural valve deterioration                                 | Respiratory complications                                          |
|---------------------------------|-----------------------------------------------------------------------------------------------------|-------------------|-------------------------------------------------------------------------------------------------------------------|----------------------------------------------------------------|--------------------------------------------------------------------|
| <b>Sanfelippo et al. 1976</b>   | -                                                                                                   | -                 | Not defined                                                                                                       |                                                                | Not defined                                                        |
| <b>Munro et al. 1995</b>        | -                                                                                                   | -                 | -                                                                                                                 | Chronically thickened and rolled leaflets in the open position | -                                                                  |
| <b>Do et al. 2000</b>           | -                                                                                                   | -                 | Requiring re-exploration                                                                                          |                                                                | -                                                                  |
| <b>Mangoni et al. 2001</b>      | Creatinine > 3 mg/dl                                                                                | Hepatomegaly      | Not defined                                                                                                       | Thickening and stiffening of the cusps                         | Mechanical ventilation > 72 hours of or reintubation               |
| <b>Tokunaga et al. 2008</b>     | -                                                                                                   | -                 | -                                                                                                                 | Primary tissue failure                                         | -                                                                  |
| <b>Capoun et al. 2010</b>       | -                                                                                                   | -                 | -                                                                                                                 | Not defined                                                    | -                                                                  |
| <b>Kim et al. 2013</b>          | Not defined                                                                                         | Cirrhosis         | Requiring re-exploration                                                                                          | Not defined                                                    | -                                                                  |
| <b>Bevan et al. 2014</b>        | Acute renal failure requiring renal replacement therapy                                             | Hepatomegaly      | Requiring re-exploration                                                                                          |                                                                | -                                                                  |
| <b>Buzzatti et al. 2014</b>     | Not defined                                                                                         | Ascites           | Requiring re-exploration                                                                                          |                                                                | -                                                                  |
| <b>Farag et al. 2017</b>        | Not defined                                                                                         | Liver enlargement | -                                                                                                                 |                                                                | -                                                                  |
| <b>Hanedan et al. 2017</b>      | -                                                                                                   | Hepatomegaly      | Requiring re-exploration                                                                                          |                                                                | Not defined                                                        |
| <b>Çakıcı et al. 2018</b>       | -                                                                                                   | -                 | Not defined                                                                                                       |                                                                | -                                                                  |
| <b>Chen et al. 2018</b>         | One or more of the following: 1) creatinine > 2 mg/dl or >50% from baseline<br>2) Need for dialysis | Liver congestion  | Requiring re-exploration                                                                                          |                                                                | Mechanical ventilation ≥ 72 hours, tracheostomy, or re-intubation. |
| <b>Moutakiallah et al. 2018</b> | Not defined                                                                                         | -                 | Major internal or external bleeding that causes death, hospitalisation, permanent injury, or required transfusion | Not defined                                                    | Mechanical ventilation ≥ 24 hours, tracheostomy, or re-intubation. |
| <b>Kundi et al. 2019</b>        | Not defined                                                                                         | -                 | Not defined                                                                                                       |                                                                | Not defined                                                        |
| <b>Liang et al. 2019</b>        | Not defined                                                                                         | -                 | Requiring re-exploration                                                                                          | Not defined                                                    | Not defined                                                        |

|                            |                       |                                                                          |                                                    |                            |
|----------------------------|-----------------------|--------------------------------------------------------------------------|----------------------------------------------------|----------------------------|
| <b>Chen et al. 2020</b>    | -                     | Hepatomegaly                                                             | -                                                  | -                          |
| <b>Wong et al. 2020</b>    | -                     | Cirrhosis                                                                | -                                                  | -                          |
| <b>Yan et al. 2020</b>     | Not defined           | Congestive liver failure or hepatic insufficiency                        | Need for blood transfusion                         | Severe pulmonary infection |
| <b>Lee et al. 2021</b>     | -                     | Cirrhosis                                                                | Transfusion of >10 units of packed red blood cells | -                          |
| <b>Leviner et al. 2021</b> | Need for hemodialysis | -                                                                        | Requiring re-exploration                           | -                          |
| <b>Liu et al. 2021</b>     | -                     | Total bilirubin >2 mg/dl or hepatic transaminase > 5x normal upper limit | Not defined                                        | Not defined                |
| <b>Park et al. 2021</b>    | -                     | -                                                                        | Requiring re-exploration                           | -                          |
| <b>Tafti et al. 2021</b>   | -                     | -                                                                        | -                                                  | Not defined                |

**Supplementary Table 1. Baseline characteristics of included patients.**

| Study (year)                | Age<br>(years $\pm$ SD) | Female<br>(%) | NYHA III/IV<br>(%) | Prior cardiac<br>surgery (%) | Secondary etiology<br>(%) |
|-----------------------------|-------------------------|---------------|--------------------|------------------------------|---------------------------|
| Sanfelippo et al. 1976      | -                       | -             | -                  | 14(93)                       | -                         |
| Glower et al. 1995          | -                       | -             | -                  | 21(60)                       | -                         |
| Munro et al. 1995           | -                       | -             | -                  | -                            | -                         |
| Do et al. 2000              | 48                      | 18(62)        | 27(93)             | 22(76)                       | -                         |
| Mangoni et al. 2001         | 61 $\pm$ 3              | 9(60)         | 11(73)             | 13(87)                       | -                         |
| Maleszka et al. 2004        | -                       | -             | 13(65)             | -                            | -                         |
| Solomon et al. 2004         | -                       | -             | -                  | 26(79)                       | -                         |
| Iscan et al. 2007           | -                       | -             | -                  | -                            | -                         |
| Tokunaga et al. 2008        | -                       | -             | -                  | -                            | -                         |
| Capoun et al. 2010          | -                       | -             | -                  | -                            | 0(0)                      |
| Baraki et al. 2013          | -                       | -             | -                  | -                            | -                         |
| Kim et al. 2013             | 56.1 $\pm$ 10.7         | 8(57)         | 8(57)              | 0(0)                         | -                         |
| Bevan et al. 2014           | 46.0                    | 21(72)        | 7(24)              | 20(69)                       | -                         |
| Buzzatti et al. 2014        | 61.7 $\pm$ 10.7         | 44(72)        | 48(79)             | 61(100)                      | -                         |
| Farag et al. 2017           | 55.7 $\pm$ 15.9         | 37(54)        | -                  | 37(54)                       | 37(54)                    |
| Hanedan et al. 2017         | 51.1 $\pm$ 10.5         | 24(80)        | 19(63)             | 30(100)                      | -                         |
| Rossello et al. 2017        | -                       | -             | -                  | -                            | -                         |
| Çakıcı et al. 2018          | -                       | -             | -                  | -                            | 0(0)                      |
| Chen et al. 2018            | 49.1 $\pm$ 12.9         | 76(64)        | 101(86)            | 49(42)                       | -                         |
| Fang et al. 2018            | -                       | -             | -                  | 90(100)                      | 90(100)                   |
| Moutakiallah et al. 2018    | -                       | -             | -                  | 11(100)                      | 1(9)                      |
| Di Mauro et al. 2019        | -                       | -             | -                  | -                            | 0(0)                      |
| Kundi et al. 2019           | -                       | -             | -                  | -                            | -                         |
| Liang et al. 2019           | 45.7 $\pm$ 13.2         | 51(67)        | 19(25)             | 0(0)                         | 0(0)                      |
| Chen et al. 2020            | 53.6 $\pm$ 12.5         | 69(64)        | 81(76)             | 107(100)                     | -                         |
| Dreyfus et al. 2020         | -                       | -             | -                  | -                            | 135(49)                   |
| Sánchez-Espín G et al. 2020 | -                       | -             | -                  | -                            | -                         |
| Wong et al. 2020            | 53.5 $\pm$ 15.9         | 61(45)        | -                  | 0(0)                         | -                         |
| Yan et al. 2020             | 54.8 $\pm$ 6.5          | 40(82)        | 38(78)             | 49(100)                      | 49(100)                   |



|                                                      |               |               |               |               |              |
|------------------------------------------------------|---------------|---------------|---------------|---------------|--------------|
| <b>Kawsara et al. 2021</b>                           | -             | -             | -             | 0(0)          | -            |
| <b>Lee et al. 2021</b>                               | 37.6±13.1     | 78(36)        | -             | 19(9)         | 0(0)         |
| <b>Leviner et al. 2021</b>                           | 60.7±11       | 24(73)        | 30(91)        | 21(64)        | -            |
| <b>Liu et al. 2021</b>                               | 39.0±16       | 116(62)       | 99(53)        | 17(9)         | 37(20)       |
| <b>Park et al. 2021</b>                              | 59.8±11.5     | 71(67)        | 49(46)        | 65(61)        | 83(78)       |
| <b>Tafti et al. 2021</b>                             | 48.8±13.5     | 31(66)        | -             | -             | -            |
| <b>Pooled estimates:<br/>mean/incidence (95% CI)</b> | 53<br>(49-56) | 63<br>(57-69) | 67<br>(53-78) | 60<br>(27-85) | 22<br>(4-69) |

*Continued...*

| Study (year)                | Endocarditis (%) | Diabetes (%) | Hypertension (%) | Atrial fibrillation (%) | Liver disease (%) | LVEF (% ± SD) |
|-----------------------------|------------------|--------------|------------------|-------------------------|-------------------|---------------|
| Sanfelippo et al. 1976      | -                | -            | -                | -                       | -                 | -             |
| Glower et al. 1995          | -                | -            | -                | -                       | -                 | -             |
| Munro et al. 1995           | -                | -            | -                | -                       | -                 | -             |
| Do et al. 2000              | -                | -            | -                | -                       | -                 | -             |
| Mangoni et al. 2001         | 2(13)            | 4(27)        | 5(33)            | -                       | 12(80)            | -             |
| Maleszka et al. 2004        | 6(30)            | -            | -                | -                       | -                 | -             |
| Solomon et al. 2004         | -                | -            | -                | -                       | -                 | -             |
| Iscan et al. 2007           | -                | -            | -                | -                       | -                 | -             |
| Tokunaga et al. 2008        | 4(13)            | -            | -                | -                       | -                 | -             |
| Capoun et al. 2010          | 11(100)          | -            | -                | -                       | -                 | -             |
| Baraki et al. 2013          | 18(100)          | -            | -                | -                       | -                 | -             |
| Kim et al. 2013             | 0(0)             | 2(14)        | 3(21)            | 6(43)                   | 0(0)              | 59.6±6.9      |
| Bevan et al. 2014           | 5(17)            | -            | -                | -                       | 13(45)            | -             |
| Buzzatti et al. 2014        | 0(0)             | 9(15)        | -                | 54(89)                  | 24(39)            | 54.4±8.3      |
| Farag et al. 2017           | 32(47)           | 15(22)       | 30(44)           | -                       | 21(31)            | -             |
| Hanedan et al. 2017         | -                | -            | -                | 24(80)                  | 22(73)            | -             |
| Rossello et al. 2017        | -                | -            | -                | -                       | -                 | -             |
| Çakıcı et al. 2018          | 25(100)          | -            | -                | -                       | -                 | -             |
| Chen et al. 2018            | -                | 5(4)         | 17(14)           | 62(53)                  | 45(38)            | 66.0±6.3      |
| Fang et al. 2018            | -                | -            | -                | -                       | -                 | -             |
| Moutakiallah et al. 2018    | -                | -            | -                | -                       | -                 | -             |
| Di Mauro et al. 2019        | 80(100)          | -            | -                | -                       | -                 | -             |
| Kundi et al. 2019           | -                | -            | -                | -                       | -                 | -             |
| Liang et al. 2019           | 0(0)             | -            | 7(9)             | 30(39)                  | -                 | 61.8±7.5      |
| Chen et al. 2020            | -                | 6(6)         | -                | 68(64)                  | 53(50)            | 51.6±6.2      |
| Dreyfus et al. 2020         | 78(29)           | -            | -                | -                       | -                 | -             |
| Sánchez-Espín G et al. 2020 | 0(0)             | -            | -                | -                       | -                 | -             |
| Wong et al. 2020            | 0(0)             | 23(17)       | 44(32)           | 57(42)                  | 18(13)            | -             |
| Yan et al. 2020             | 0(0)             | 7(14)        | 20(41)           | 44(90)                  | 12(24)            | 57.9±3.5      |
| Kawsara et al. 2021         | 0(0)             | -            | -                | -                       | -                 | -             |
| Lee et al. 2021             | 216(100)         | 17(8)        | 18(8)            | -                       | 16(7)             | -             |

|                                                      |              |               |               |               |               |               |
|------------------------------------------------------|--------------|---------------|---------------|---------------|---------------|---------------|
| <b>Leviner et al. 2021</b>                           | 0(0)         | 9(27)         | 16(48)        | 27(82)        | -             | -             |
| <b>Liu et al. 2021</b>                               | 22(12)       | 23(12)        | 19(10)        | 62(33)        | 19(10)        | 62.0±6.0      |
| <b>Park et al. 2021</b>                              | 0(0)         | 12(11)        | 27(25)        | 59(56)        | -             | 57.9±3.5      |
| <b>Tafti et al. 2021</b>                             | -            | 6(13)         | -             | -             | -             | 47.4±7.8      |
| <b>Pooled estimates:<br/>mean/incidence (95% CI)</b> | 18<br>(4-52) | 13<br>(10-17) | 23<br>(15-33) | 63<br>(48-75) | 31<br>(18-48) | 58<br>(54-61) |

CI: confidence interval; LVEF: left ventricular ejection fraction; NYHA: New York Heart Association; NR: not reported; SD: standard deviation.

**Supplementary Table 2. Risk of bias assessment – observational studies.**

Risk of bias in non-randomized studies of interventions assessment tool from the Cochrane handbook (ROBINS-I) for the outcome of operative mortality.

| Study             |             | Pre-Intervention               |                                                         | At Intervention                                | Post-intervention                                         |                                 |                                        |                                                 | Overall risk of bias     |
|-------------------|-------------|--------------------------------|---------------------------------------------------------|------------------------------------------------|-----------------------------------------------------------|---------------------------------|----------------------------------------|-------------------------------------------------|--------------------------|
| <i>Study</i>      | <i>Year</i> | <i>Bias due to confounding</i> | <i>Bias in selection of participants into the study</i> | <i>Bias in classification of interventions</i> | <i>Bias due to deviations from intended interventions</i> | <i>Bias due to missing data</i> | <i>Bias in measurement of outcomes</i> | <i>Bias in selection of the reported result</i> | <i>Low/moderate/high</i> |
| Sanfelippo et al. | 1976        | ✘                              | ✓                                                       | ✓                                              | ✓                                                         | ✓                               | ✓                                      | ✓                                               | ✘                        |
| Glower et al.     | 1995        | ⚠                              | ✓                                                       | ✓                                              | ✓                                                         | ✓                               | ✓                                      | ✓                                               | ⚠                        |
| Munro et al.      | 1995        | ✘                              | ✓                                                       | ✓                                              | ✓                                                         | ✓                               | ✓                                      | ✓                                               | ✘                        |
| Do et al.         | 2000        | NA                             | NA                                                      | NA                                             | NA                                                        | NA                              | NA                                     | NA                                              | ✘                        |
| Mangoni et al.    | 2001        | ⚠                              | ✓                                                       | ✓                                              | ✓                                                         | ✓                               | ✓                                      | ✓                                               | ⚠                        |
| Maleszka et al.   | 2004        | NA                             | NA                                                      | NA                                             | NA                                                        | NA                              | NA                                     | NA                                              | ✘                        |
| Solomon et al.    | 2004        | ✘                              | ✓                                                       | ✓                                              | ✓                                                         | ✓                               | ✓                                      | ✓                                               | ✘                        |
| Iscan et al.      | 2007        | ⚠                              | ✓                                                       | ✓                                              | ✓                                                         | ✓                               | ✓                                      | ✓                                               | ⚠                        |
| Tokunaga et al.   | 2008        | ✘                              | ✓                                                       | ✓                                              | ✓                                                         | ✓                               | ✓                                      | ✓                                               | ✘                        |
| Capoun et al.     | 2010        | ⚠                              | ✓                                                       | ✓                                              | ✓                                                         | ✓                               | ✓                                      | ✓                                               | ⚠                        |
| Baraki et al.     | 2013        | ✘                              | ⚠                                                       | ✓                                              | ✓                                                         | ⚠                               | ✓                                      | ✓                                               | ✘                        |
| Kim et al.        | 2013        | ⚠                              | ✓                                                       | ✓                                              | ✓                                                         | ✓                               | ✓                                      | ✓                                               | ⚠                        |
| Bevan et al.      | 2014        | ⚠                              | ✓                                                       | ✓                                              | ✓                                                         | ✓                               | ✓                                      | ✓                                               | ⚠                        |
| Buzzatti et al.   | 2014        | ⚠                              | ✓                                                       | ✓                                              | ✓                                                         | ✓                               | ✓                                      | ✓                                               | ⚠                        |
| Farag et al.      | 2017        | ⚠                              | ✓                                                       | ✓                                              | ✓                                                         | ✓                               | ✓                                      | ✓                                               | ⚠                        |
| Hanedan et al.    | 2017        | ✓                              | ✓                                                       | ✓                                              | ✓                                                         | ✓                               | ✓                                      | ✓                                               | ✓                        |
| Rossello et al.   | 2017        | ⚠                              | ✓                                                       | ✓                                              | ✓                                                         | ✓                               | ✓                                      | ✓                                               | ⚠                        |
| Çakıcı et al.     | 2018        | ⚠                              | ✓                                                       | ✓                                              | ✓                                                         | ✓                               | ✓                                      | ✓                                               | ⚠                        |

|                        |      |    |    |   |   |   |    |    |   |    |
|------------------------|------|----|----|---|---|---|----|----|---|----|
| Chen et al.            | 2018 | ⚠️ | ✅  | ✅ | ✅ | ✅ | ✅  | ✅  | ✅ | ⚠️ |
| Fang et al.            | 2018 | ⚠️ | ✅  | ✅ | ✅ | ✅ | ✅  | ✅  | ✅ | ⚠️ |
| Moutakiallah et al.    | 2018 | ⚠️ | ✅  | ✅ | ✅ | ✅ | ✅  | ✅  | ✅ | ⚠️ |
| Di Mauro et al.        | 2019 | ❌  | ⚠️ | ✅ | ✅ | ✅ | ✅  | ⚠️ | ✅ | ❌  |
| Kundi et al.           | 2019 | ⚠️ | ⚠️ | ✅ | ✅ | ✅ | ✅  | ✅  | ✅ | ⚠️ |
| Liang et al.           | 2019 | ❌  | ⚠️ | ✅ | ✅ | ✅ | ✅  | ✅  | ✅ | ❌  |
| Chen et al.            | 2020 | ⚠️ | ✅  | ✅ | ✅ | ✅ | ✅  | ✅  | ✅ | ⚠️ |
| Dreyfus et al.         | 2020 | ⚠️ | ✅  | ✅ | ✅ | ✅ | ✅  | ✅  | ✅ | ⚠️ |
| Sánchez-Espín G et al. | 2020 | ⚠️ | ✅  | ✅ | ✅ | ✅ | ✅  | ✅  | ✅ | ⚠️ |
| Wong et al.            | 2020 | ⚠️ | ✅  | ✅ | ✅ | ✅ | ✅  | ✅  | ✅ | ⚠️ |
| Yan et al.             | 2020 | ⚠️ | ✅  | ✅ | ✅ | ✅ | ✅  | ✅  | ✅ | ⚠️ |
| Kawsara et al.         | 2021 | ⚠️ | ✅  | ✅ | ✅ | ✅ | ✅  | ✅  | ✅ | ⚠️ |
| Lee et al.             | 2021 | ⚠️ | ✅  | ✅ | ✅ | ✅ | ✅  | ✅  | ✅ | ⚠️ |
| Leviner et al.         | 2021 | ⚠️ | ✅  | ✅ | ✅ | ✅ | ✅  | ✅  | ✅ | ⚠️ |
| Liu et al.             | 2021 | ⚠️ | ⚠️ | ✅ | ✅ | ✅ | ✅  | ✅  | ✅ | ⚠️ |
| Park et al.            | 2021 | ⚠️ | ✅  | ✅ | ✅ | ✅ | ✅  | ✅  | ✅ | ⚠️ |
| Tafti et al.           | 2021 | ⚠️ | ✅  | ✅ | ✅ | ✅ | ⚠️ | ✅  | ✅ | ⚠️ |

✅ = low risk; ⚠️ = moderate risk; ❌ = high risk

**Supplementary Table 3. Key study features – bioprosthetic tricuspid valve replacement.**

| <b>Study</b>           | <b>Year</b> | <b>Patients</b> | <b>Operative Time</b> | <b>Country</b> | <b>Multicenter (n)</b> | <b>Follow-up (years)</b> |
|------------------------|-------------|-----------------|-----------------------|----------------|------------------------|--------------------------|
| Glower et al.          | 1995        | 35              | 1974-1993             | USA            | No                     | In-hospital              |
| Tokunaga et al.        | 2008        | 27              | 1975-2004             | Japan          | No                     | 8                        |
| Baraki et al.          | 2013        | 14              | 1996-2012             | Germany        | No                     | 6                        |
| Kim et al.             | 2013        | 10              | 1996-2010             | Korea          | No                     | 3                        |
| Hanedan et al.         | 2017        | 10              | 2004-2011             | Turkey         | No                     | 2                        |
| Chen et al.            | 2018        | 102             | 2003-2016             | China          | No                     | In-hospital              |
| Fang et al.            | 2018        | 74              | 2007-2016             | China          | No                     | 9                        |
| Kundi et al.           | 2019        | 1737            | 2003-2014             | USA            | Yes (841)              | 1                        |
| Liang et al.           | 2019        | 43              | 2010-2017             | China          | No                     | 4                        |
| Chen et al.            | 2020        | 25              | 2009-2017             | China          | No                     | 5                        |
| Sánchez-Espín G et al. | 2020        | 48              | 1996-2017             | Spain          | No                     | 4                        |
| Yan et al.             | 2020        | 49              | 2012-2019             | China          | No                     | 2                        |
| Kawsara et al.         | 2021        | 468             | 2016-2017             | USA            | Yes                    | In-hospital              |
| Liu et al.             | 2021        | 145             | 1999-2018             | China          | Yes (2)                | 11                       |

**Supplementary Table 4. Meta-regression analysis.**

| Covariate                           | $\beta$ | Lower bound | Upper bound | Standard Error | p value |
|-------------------------------------|---------|-------------|-------------|----------------|---------|
| <b><i>Operative Mortality</i></b>   |         |             |             |                |         |
| Year of publication                 | -0.037  | -0.063      | -0.011      | 0.013          | 0.006   |
| Operative period >1995 (ref. <1995) | -0.626  | -1.392      | 1.140       | 0.7376         | 0.105   |
| Europe (ref. North America)         | -0.467  | -1.332      | 0.398       | 0.423          | 0.278   |
| Asia (ref. North America)           | -0.593  | -1.357      | 0.171       | 0.373          | 0.123   |
| Low Risk of Bias (ref. High)        | 0.858   | -0.747      | 2.462       | 0.788          | 0.285   |
| Moderate Risk of Bias (ref. High)   | -0.423  | -1.090      | 0.245       | 0.328          | 0.206   |
| Bioprostheses                       | -0.006  | -0.018      | 0.006       | 0.006          | 0.337   |
| Age                                 | 0.006   | -0.066      | 0.078       | 0.034          | 0.865   |
| Sex (female)                        | 0.005   | -0.038      | 0.048       | 0.020          | 0.798   |
| Hypertension                        | 0.014   | -0.027      | 0.054       | 0.018          | 0.461   |
| Diabetes                            | -0.002  | -0.081      | 0.076       | 0.036          | 0.948   |
| Atrial Fibrillation                 | 0.020   | -0.013      | 0.053       | 0.015          | 0.201   |
| Liver disease                       | 0.021   | 0.006       | 0.037       | 0.007          | 0.013   |
| Secondary TR                        | -0.008  | -0.024      | 0.007       | 0.007          | 0.264   |
| Previous Cardiac Surgery            | 0.010   | -0.000      | 0.021       | 0.005          | 0.056   |
| Endocarditis                        | 0.006   | -0.001      | 0.013       | 0.003          | 0.092   |
| LV Ejection Fraction                | -0.116  | -0.241      | 0.010       | 0.053          | 0.065   |

LV: left ventricle; TR: tricuspid regurgitation

**Supplementary Table 5. Early and late outcomes – no endocarditis.**

| <b>Outcome</b>                                | <b>Proportion/Incidence rate<br/>% (95% CI)</b> | <b>I<sup>2</sup><br/>% (<math>\chi^2</math> P-value)</b> | <b>N. of<br/>studies</b> |
|-----------------------------------------------|-------------------------------------------------|----------------------------------------------------------|--------------------------|
| <b>EARLY OUTCOMES</b>                         |                                                 |                                                          |                          |
| <b>Operative Mortality</b>                    | 12 (9–17)                                       | 74 (<0.01)                                               | 23                       |
| <b>Bleeding</b>                               | 11 (6-19)                                       | 85 (<0.01)                                               | 12                       |
| <b>Acute Kidney Injury</b>                    | 14 (7-25)                                       | 90 (<0.01)                                               | 8                        |
| <b>Renal Replacement Therapy</b>              | 6 (2-19)                                        | 70 (<0.01)                                               | 4                        |
| <b>Pacemaker</b>                              | 9 (5-16)                                        | 71 (<0.01)                                               | 9                        |
| <b>Respiratory Complications</b>              | 15 (11-19)                                      | 0 (0.64)                                                 | 6                        |
| <b>Stroke</b>                                 | 2 (1-5)                                         | 80 (<0.01)                                               | 6                        |
| <b>Wound Infection</b>                        | 3 (1-5)                                         | 80 (<0.01)                                               | 7                        |
| <b>LATE OUTCOMES</b>                          |                                                 |                                                          |                          |
| <b>Late Mortality*</b>                        | 7 (4-12)                                        | 94 (<0.01)                                               | 15                       |
| <b>Re-intervention*</b>                       | 2 (1-3)                                         | 31 (0.17)                                                | 9                        |
| <b>Structural Valve Deterioration*</b>        | 4 (3-6)                                         | 44 (0.13)                                                | 5                        |
| <b>Valve Thrombosis*</b>                      | 1 (0-3)                                         | 0 (0.56)                                                 | 3                        |
| <b>Recurrence of TR <math>\geq 2^*</math></b> | 5 (2-13)                                        | 85 (<0.01)                                               | 4                        |
| <b>BIOPROSTHESES</b>                          |                                                 |                                                          |                          |
| <b>Late Mortality*</b>                        | 7 (2-23)                                        | 91 (<0.01)                                               | 6                        |
| <b>Re-intervention*</b>                       | 1 (0-3)                                         | 0 (0.58)                                                 | 4                        |
| <b>Structural Valve Deterioration*</b>        | 5 (3-9)                                         | 34 (0.22)                                                | 2                        |
| <b>Valve Thrombosis*</b>                      | 1 (0-2)                                         | 0 (0.77)                                                 | 2                        |
| <b>Recurrence of TR <math>\geq 2^*</math></b> | 5 (2-15)                                        | 89 (<0.01)                                               | 3                        |

\* per 100 person-years

CI: confidence interval; TR: tricuspid regurgitation



Supplementary Table 6. Early and late outcomes – fixed effects models.

| Outcome                         | Proportion/Incidence rate<br>% (95% CI) | I <sup>2</sup><br>% ( $\chi^2$ P-value) | N. of studies |
|---------------------------------|-----------------------------------------|-----------------------------------------|---------------|
| <b>EARLY OUTCOMES</b>           |                                         |                                         |               |
| Bleeding                        | 10 (9-12)                               | 83 (<0.01)                              | 17            |
| Acute Kidney Injury             | 12 (11-14)                              | 89 (<0.01)                              | 11            |
| Renal Replacement Therapy       | 11 (8-14)                               | 63 (0.01)                               | 7             |
| Pacemaker                       | 11 (9-14)                               | 75 (<0.01)                              | 13            |
| Respiratory Complications       | 15 (12-20)                              | 0 (0.56)                                | 7             |
| Stroke                          | 1 (1-2)                                 | 74 (<0.01)                              | 9             |
| Wound Infection                 | 2 (1-2)                                 | 81 (<0.01)                              | 10            |
| <b>LATE OUTCOMES</b>            |                                         |                                         |               |
| Late Mortality*                 | 19 (18-20)                              | 96 (<0.01)                              | 23            |
| Re-intervention*                | 2 (2-3)                                 | 64 (<0.01)                              | 15            |
| Structural Valve Deterioration* | 2 (2-3)                                 | 82 (<0.01)                              | 9             |
| Valve Thrombosis*               | 1 (0-1)                                 | 49 (0.07)                               | 8             |
| Recurrence of TR $\geq 2^*$     | 5 (3-8)                                 | 85 (<0.01)                              | 4             |
| <b>BIOPROSTHESES</b>            |                                         |                                         |               |
| Late Mortality*                 | 22 (20-24)                              | 97 (<0.01)                              | 8             |
| Re-intervention*                | 1 (1-2)                                 | 77 (<0.01)                              | 5             |
| Structural Valve Deterioration* | 2 (2-4)                                 | 91 (<0.01)                              | 4             |
| Valve Thrombosis*               | 0 (0-1)                                 | 68 (0.04)                               | 3             |
| Recurrence of TR $\geq 2^*$     | 8 (5-13)                                | 33 (0.22)                               | 3             |

\* per 100 person-years

CI: confidence interval; TR: tricuspid regurgitation

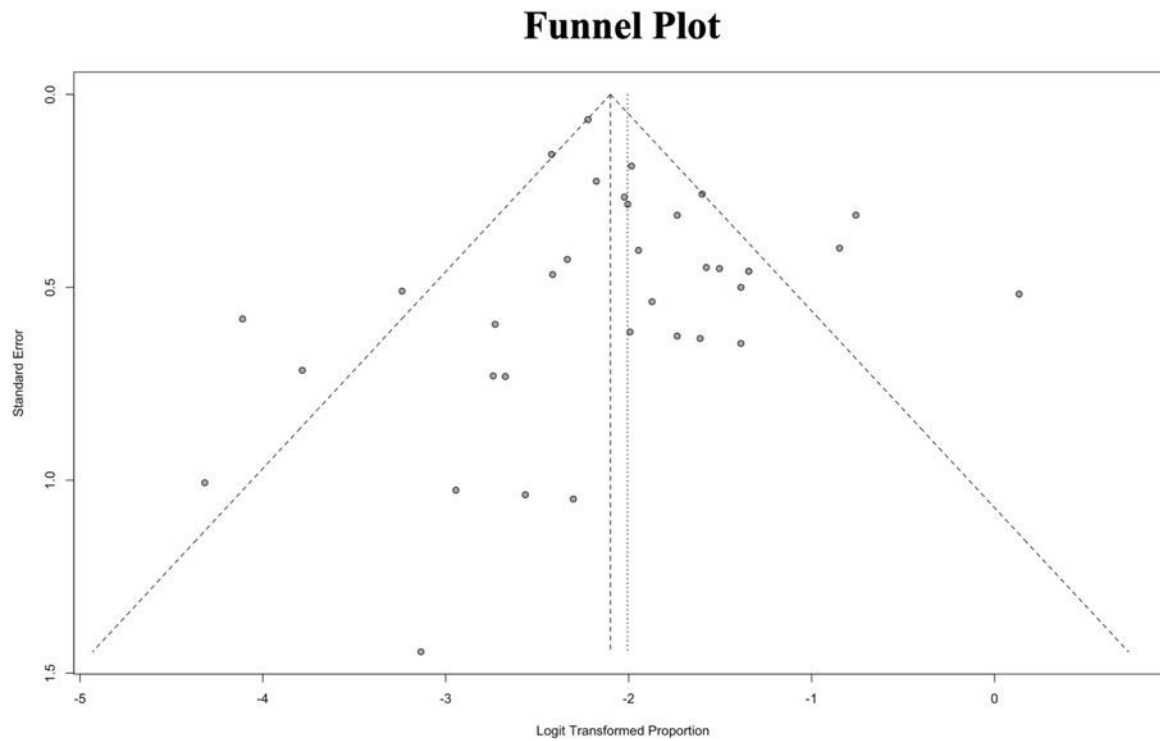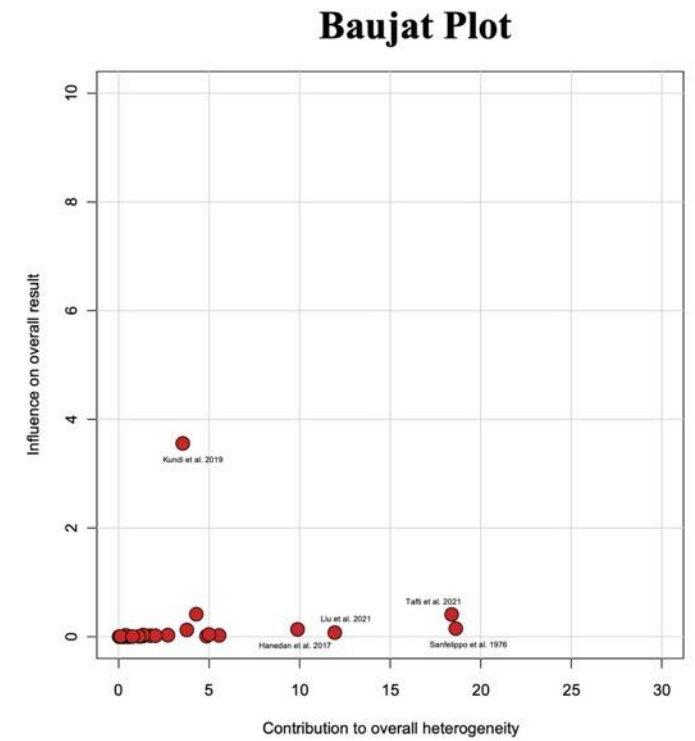

**Supplementary Figure 1. Funnel plot and Baujat plot.**

Funnel plot and Baujat plot of primary endpoint (operative mortality).

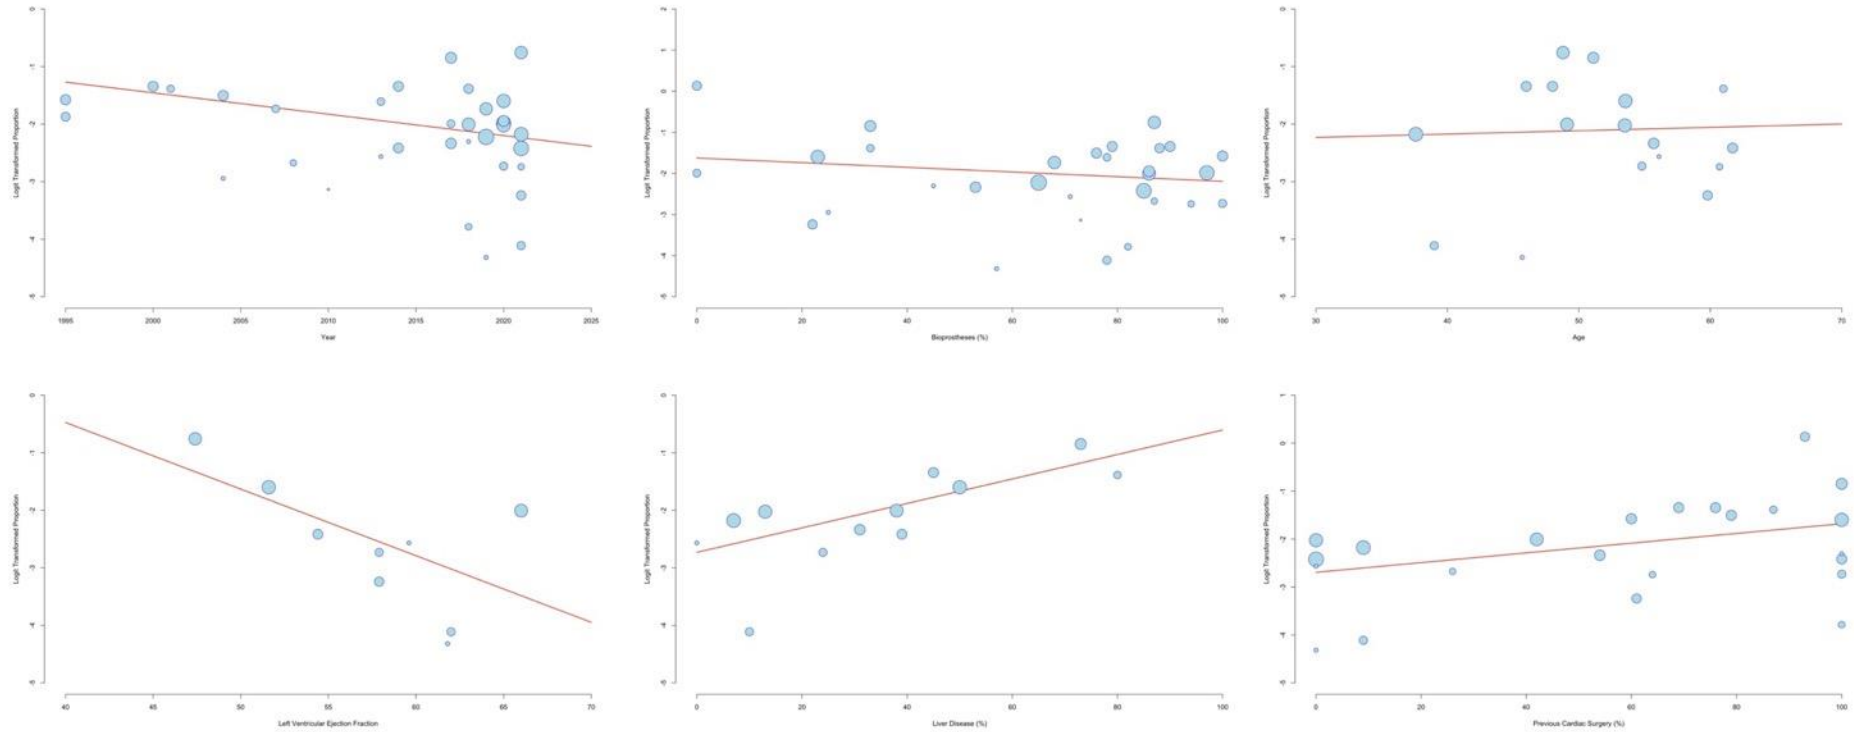

**Supplementary Figure 2. Bubble plots for meta-regression analysis.**

Bubble plots of the effect of continuous covariates on the overall estimate of primary endpoint (operative mortality) with predicted regression line (red). The size of the bubbles is proportional to the study weights

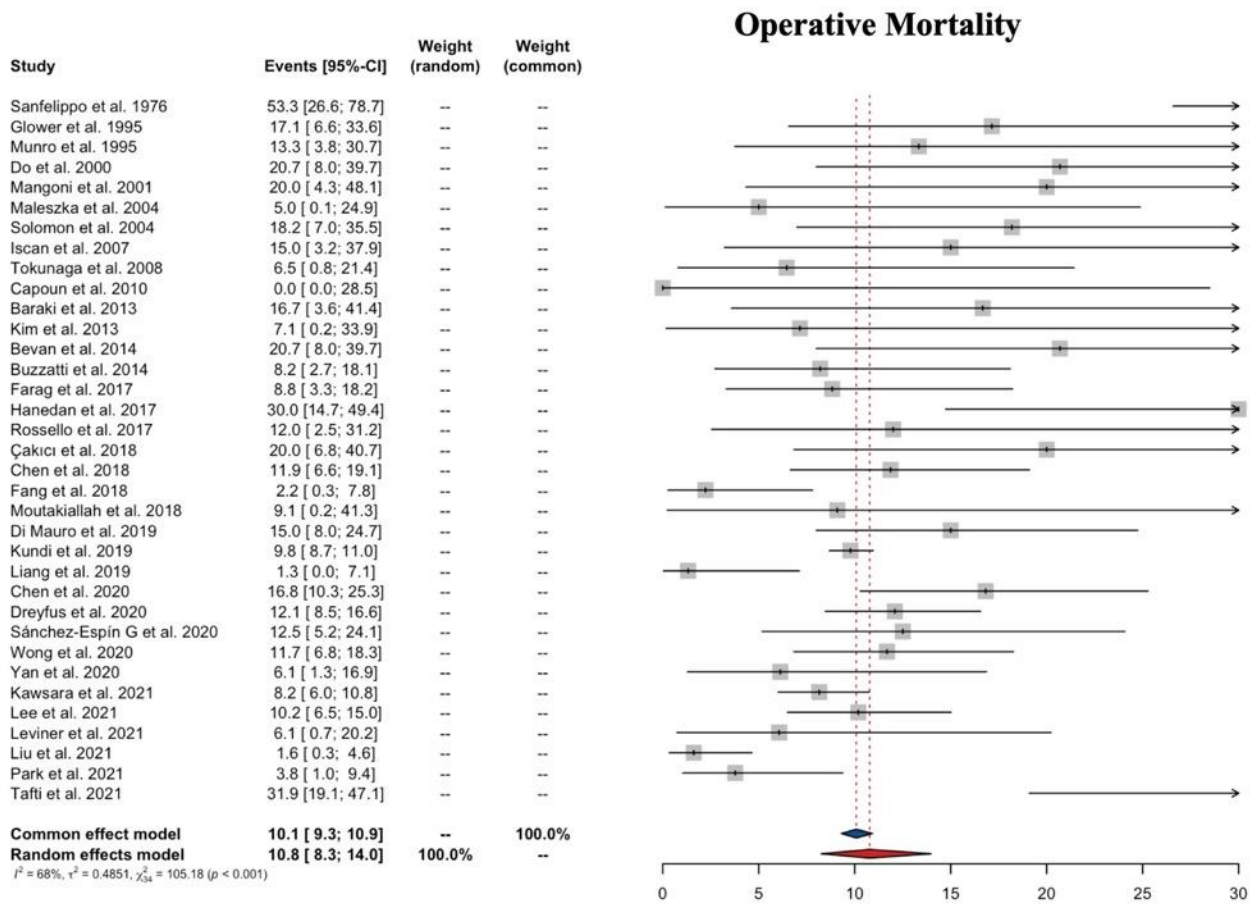

**Supplementary Figure 3. Meta-analysis using a random intercept logistic regression model.**

Forest plot of primary endpoint (operative mortality) assessed with a random intercept logistic regression model. CI = confidence interval.

## Leave-one-Out

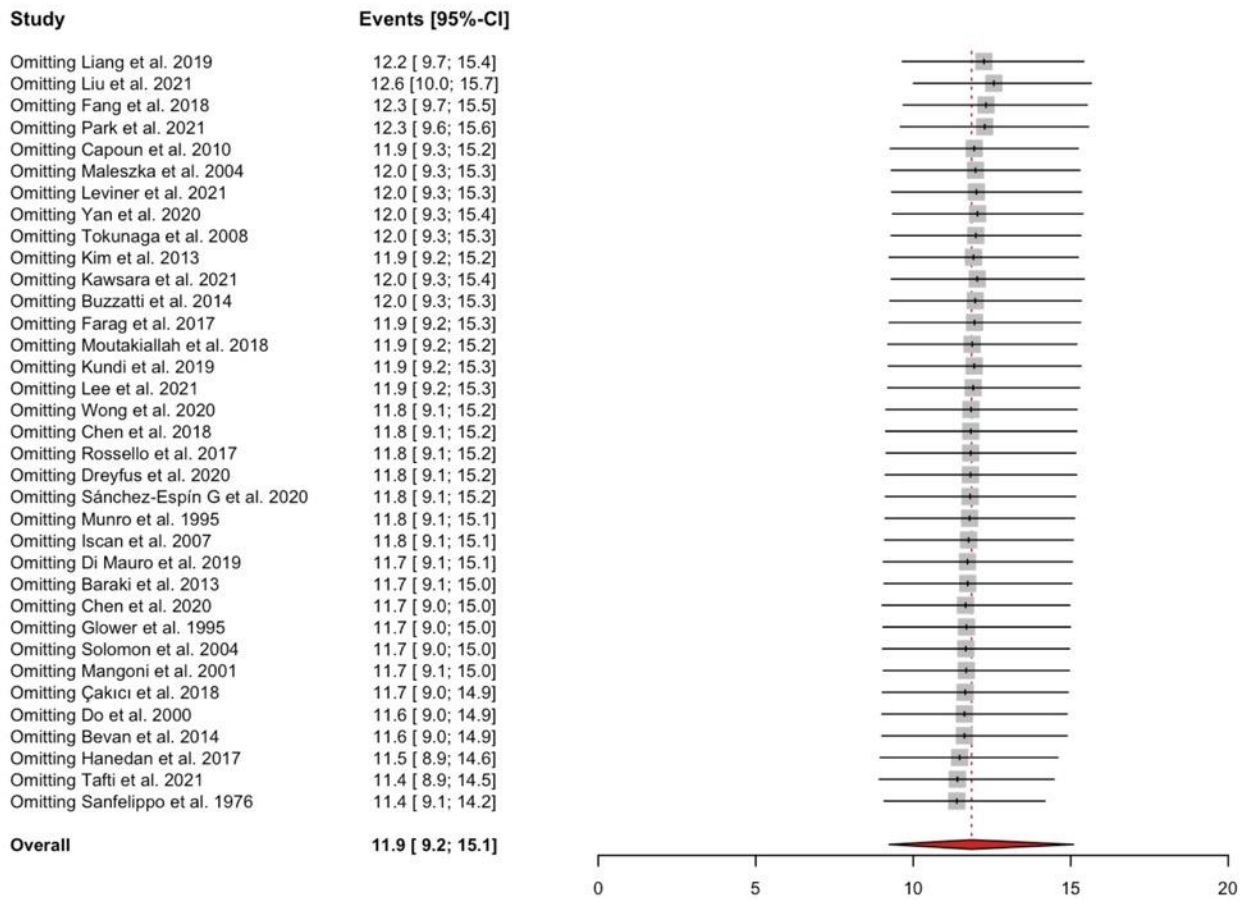

### Supplementary Figure 4. Leave-one-out meta-analysis.

Forest plots of primary endpoint (operative mortality) assessed excluding one study per analysis (leave-one-out) with random-effects models.

CI = confidence interval

## Cumulative

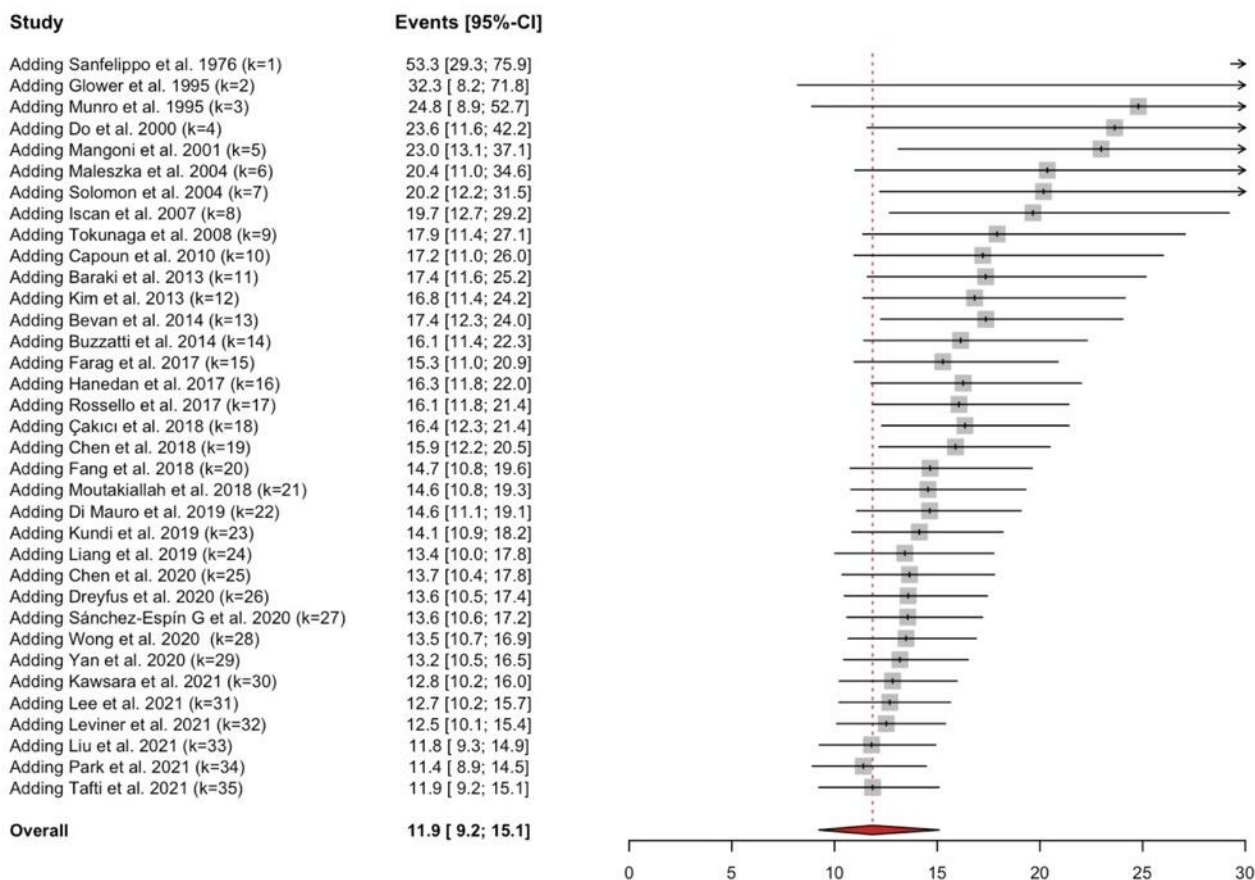

### Supplementary Figure 5. Cumulative meta-analysis.

Forest plots of primary endpoint (operative mortality) assessed adding one study at a time (cumulative) with random-effects models analysis. *CI = confidence interval*.
